# Supplementary material
Source: HighWire-hosted journal article supplement (http://dmd.aspetjournals.org/highwire/filestream/73813/field_highwire_adjunct_files/0/87734_Sajid_et_al._Supplementary_Materials_6_18.pdf)
Supplement: 87734_Sajid_et_al._Supplementary_Materials_6_18.pdf [file 87734_Sajid_et_al._Supplementary_Materials_6_18.pdf]

## *Drug Metabolism and Disposition*

*Supplementary Materials for:*

**Synthesis and characterization of BODIPY-FL-cyclosporine A as a substrate for multidrug resistance-linked P-glycoprotein (ABCB1)**

Andaleeb Sajid, Natarajan Raju, Sabrina Lusvarghi, Shahrooz Vahedi, Rolf E. Swenson, Suresh V. Ambudkar

**Table S1: Docking scores of the 9 lowest energy poses of CsA, NBD-CsA and BD-CsA docked into human P-gp structure (6QEX.pdb).**

| Docking pose number | Docking energy (kcal/mol) |         |        |
|---------------------|---------------------------|---------|--------|
|                     | CsA                       | NBD-CsA | BD-CsA |
| 1                   | -14.5                     | -14.5   | -14.5  |
| 2                   | -14.5                     | -13.8   | -13.8  |
| 3                   | -14.2                     | -13.8   | -13.2  |
| 4                   | -14.1                     | -13.8   | -12.2  |
| 5                   | -13.5                     | -13.8   | -12.1  |
| 6                   | -13.3                     | -13.8   | -12.1  |
| 7                   | -13.2                     | -13.7   | -12.1  |
| 8                   | -13.2                     | -13.7   | -12    |
| 9                   | -13.2                     | -13.6   | -11.9  |

Autodock Vina program was used for docking ligands in the drug-binding pocket of human P-gp as described in the Materials and Methods Section.

**Table S2: List of amino acid residues present within a 5Å distance of CsA, NBD-CsA and BD-CsA in pose 1 obtained by docking in the drug-binding pocket of human P-gp structure (6QEX.pdb).**

| Residues within 5Å of pose 1 for CsA | Residues within 5Å of pose 1 for NBD-CsA | Residues within 5Å of pose 1 for BD-CsA |
|--------------------------------------|------------------------------------------|-----------------------------------------|
| LEU 65                               | LEU 65                                   | LEU 65                                  |
| MET 68                               | MET 68                                   | MET 68                                  |
| MET 69                               | MET 69                                   | MET 69                                  |
| PHE 72                               | GLN 195                                  | MET 192                                 |
| TRP 232                              | TRP 232                                  | GLN 195                                 |
| ALA 302                              | PHE 239                                  | SER 196                                 |
| PHE 303                              | ASN 296                                  | THR 199                                 |
| ILE 306                              | PHE 303                                  | SER 228                                 |
| TYR 307                              | ILE 306                                  | ALA 229                                 |
| TYR 310                              | TYR 307                                  | TRP 232                                 |
| PHE 336                              | TYR 310                                  | ALA 233                                 |
| LEU 339                              | PHE 336                                  | LEU 236                                 |
| ILE 340                              | LEU 339                                  | ILE 299                                 |
| PHE 343                              | ILE 340                                  | PHE 303                                 |
| GLN 347                              | PHE 343                                  | ILE 306                                 |
| GLN 725                              | SER 344                                  | TYR 307                                 |
| PHE 728                              | GLN 347                                  | TYR 310                                 |
| PHE 732                              | ASN 721                                  | PHE 336                                 |
| GLU 875                              | GLY 722                                  | LEU 339                                 |
| MET 876                              | LEU 724                                  | ILE 340                                 |
| LEU 879                              | GLN 725                                  | PHE 343                                 |
| GLN 946                              | PHE 728                                  | SER 344                                 |

|         |         |         |
|---------|---------|---------|
| MET 949 | PHE 770 | GLN 347 |
| TYR 950 | GLN 773 | ASN 721 |
| TYR 953 | SER 831 | GLY 722 |
| PHE 957 | ALA 834 | LEU 724 |
| LEU 975 | VAL 835 | GLN 725 |
| PHE 978 | GLN 838 | PHE 728 |
| SER 979 | ASN 842 | SER 766 |
| VAL 982 | GLU 875 | PHE 770 |
| PHE 983 | MET 876 | GLN 773 |
| MET 986 | MET 949 | GLN 838 |
| ALA 987 | TYR 953 | ASN 842 |
| GLN 990 | SER 979 | GLU 875 |
|         | PHE 983 | MET 876 |
|         | MET 986 | LEU 879 |
|         | ALA 987 | GLN 946 |
|         | GLN 990 | MET 949 |
|         | VAL 991 | TYR 953 |
|         | PHE 994 | VAL 982 |
|         | ALA 995 | PHE 983 |
|         | PRO 996 | MET 986 |
|         |         | ALA 987 |
|         |         | GLN 990 |
|         |         | VAL 991 |
|         |         | PHE 994 |

### HPLC trace of 6

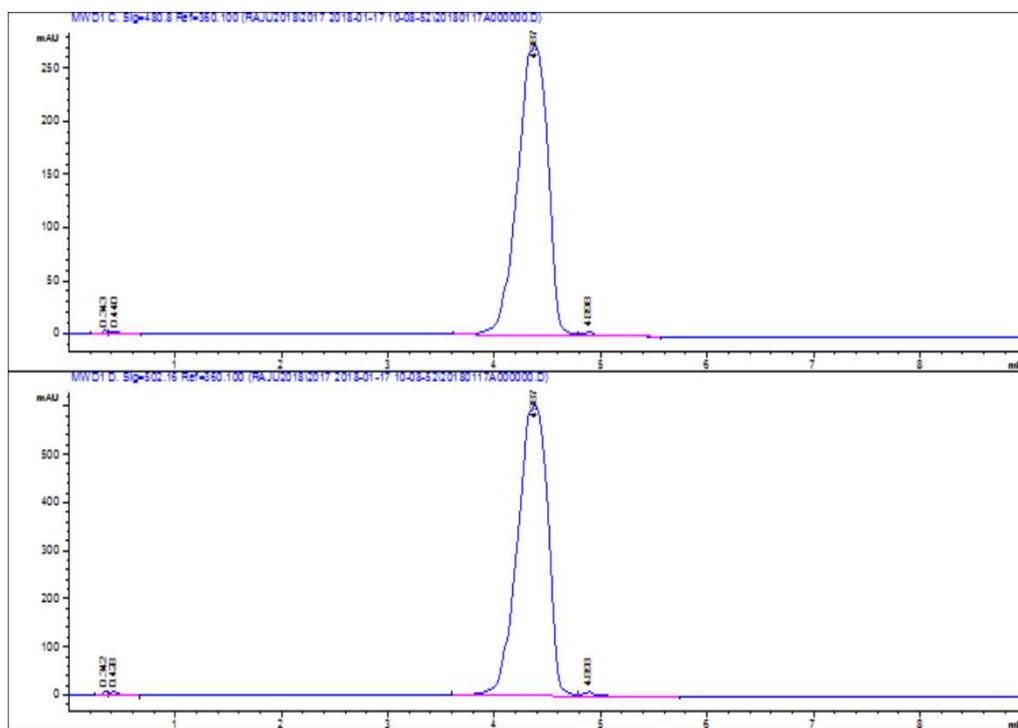

**Figure S1.** HPLC trace of purified BD-CsA: Histogram showing the HPLC trace of compound 6, referring to BD-CsA purity.

### Mass spectrum of 6

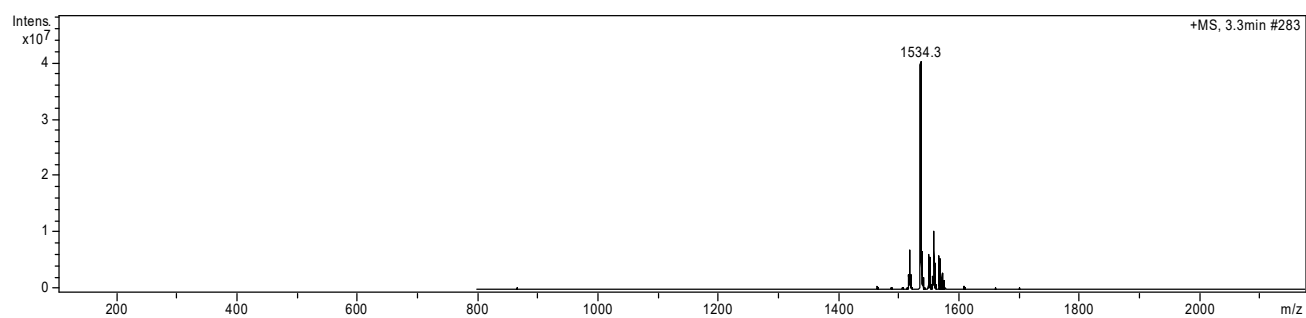

**Figure S2.** Mass spectrum of BD-CsA: Histogram showing MS spectra of compound 6, purified as BD-CsA. The single peak at 1534.3 Da indicates compound purity.

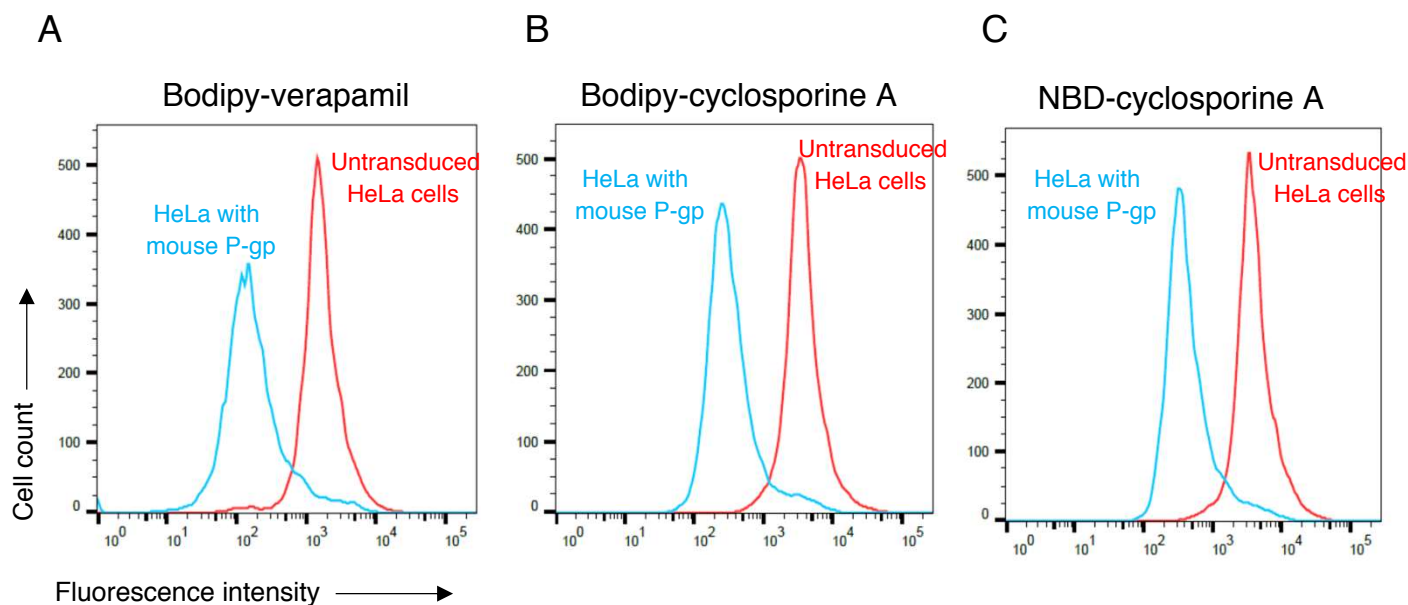

**Figure S3.** BD-CsA is a substrate for mouse P-gp: HeLa cells were transduced with BacMam baculovirus to express mouse P-gp and untransduced cells were used as a control. Cells were incubated with BD-CsA or NBD-CsA ( $0.5 \mu\text{M}$ , each) for 45 minutes at  $37^\circ\text{C}$  and fluorescence was measured using flow cytometry. Histogram traces show the transport of substrates by mouse P-gp, (A) BD-verapamil, (B) BD-CsA and (C) NBD-CsA. The efflux by P-gp was assayed by comparing the fluorescence intensity of cells expressing P-gp (blue traces) with those that do not express P-gp (untransduced cells, red traces).

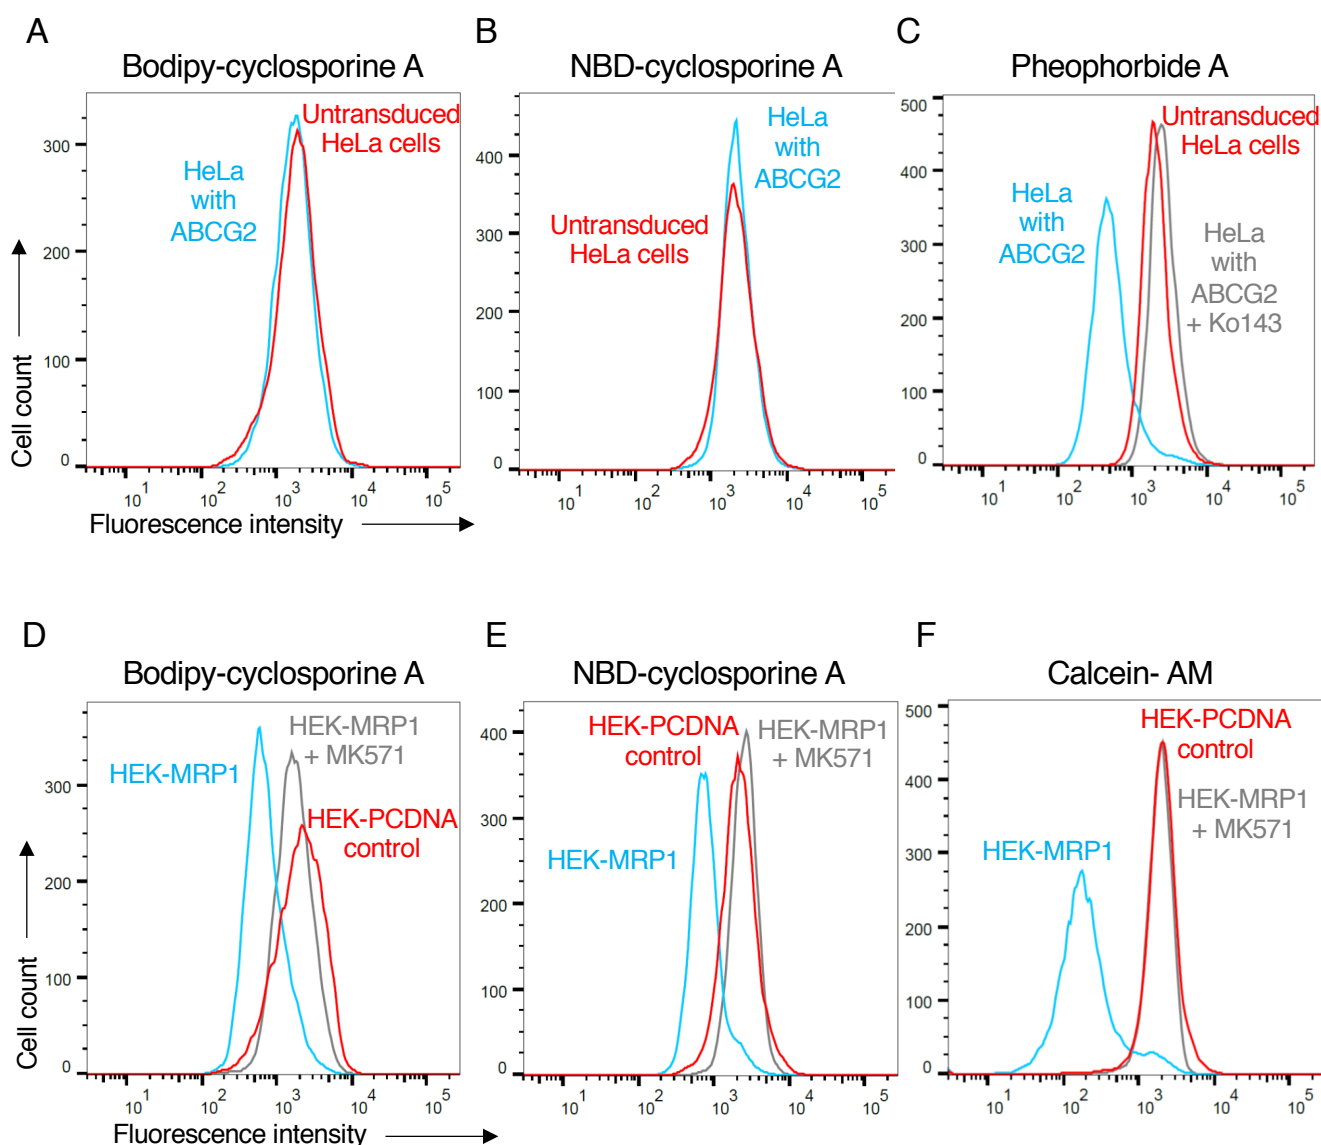

**Figure S4.** Efflux of BD-CsA and NBD-CsA by human ABCG2 and MRP1: (A-C) HeLa cells were transduced with BacMam baculovirus to express human ABCG2 and untransduced cells were used as a control. Cells were incubated with BD-CsA, NBD-CsA ( $0.5 \mu\text{M}$ , each) or pheophorbide A ( $2 \mu\text{M}$ ) for 45 minutes at  $37^\circ\text{C}$  and fluorescence was measured using flow cytometry. Histogram traces show the transport of substrates by ABCG2, (A) BD-CsA, (B) NBD-CsA and (C) Pheophorbide A (known ABCG2 substrate). The ABCG2 inhibitor Ko143 ( $2.5 \mu\text{M}$ ) was used to indicate the specificity of ABCG2. (D-F) HEK-cells transfected with MRP1 or PCDNA3.1 (vector control) were used. Histogram traces show the transport activity of MRP1 with (D) BD-CsA, (E) NBD-CsA and (F) calcein-AM (known MRP1 substrate). The MRP1 inhibitor MK571 was used at  $25 \mu\text{M}$ . The efflux was assayed by comparing the fluorescence intensity of cells expressing the transporter (blue traces) with control (untransduced or parental) cells (red traces). The traces of cells expressing the transporters in the presence of inhibitors are shown in grey.



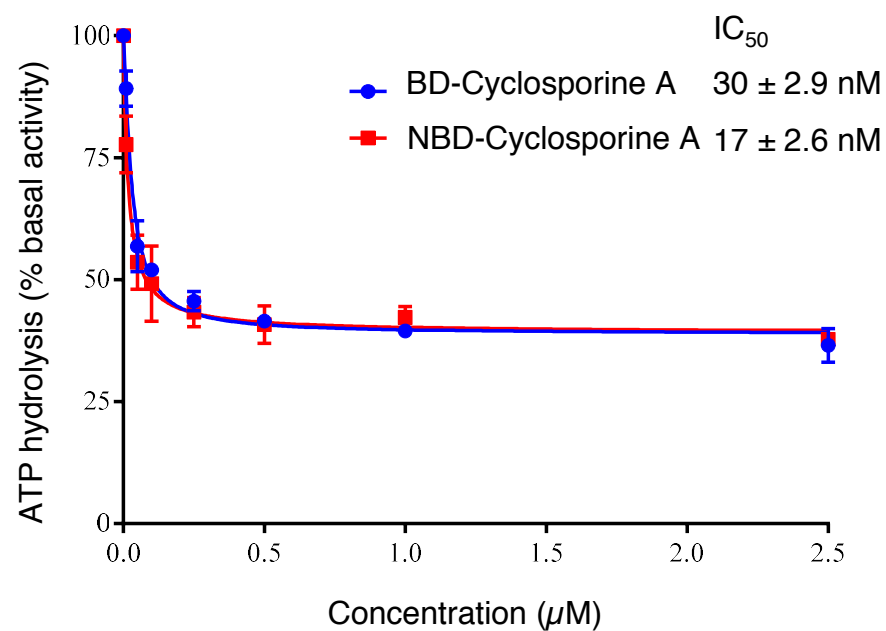

**Figure S5.** Effect of BD-CsA and NBD-CsA on ATPase activity of P-gp: ATPase activity of human P-gp was assayed in insect cell membrane vesicles and the effect of BD-CsA or NBD-CsA at indicated concentrations was measured as described in the Materials and Methods. Both compounds partially inhibited the ATPase activity with  $IC_{50}$  of  $30 \pm 2.9$  nM for BD-CsA and  $17 \pm 2.6$  nM for NBD-CsA.

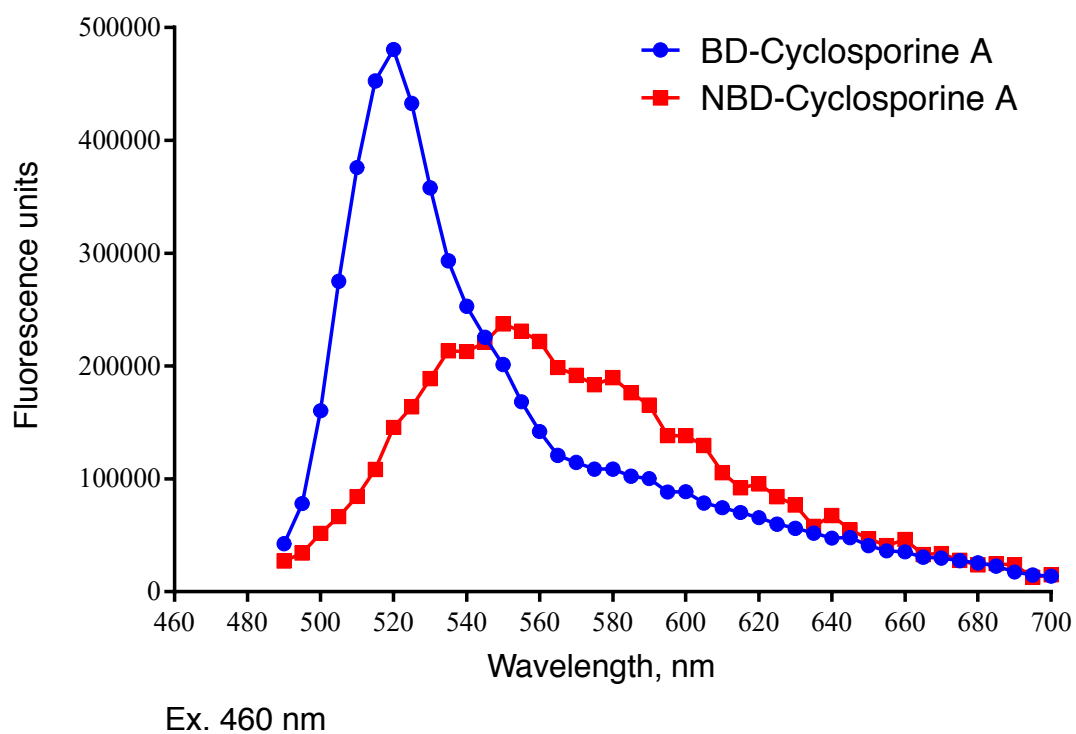

**Figure S6.** Fluorescence emission spectra of BD-CsA and NBD-CsA: Histogram showing the fluorescence emission spectra of BD-CsA (blue circles) and NBD-CsA (red squares), with excitation at 460 nm.
